# Supplementary material
Source: PubMed Central journal article supplement (PMC3546830)
Supplement: NIHMS415277-supplement-1_si_001.pdf [file NIHMS415277-supplement-1_si_001.pdf]

## Mesostructured Block Copolymer Nanoparticles: Versatile Templates for Hybrid Inorganic/Organic Nanostructures

Luke A. Connal,<sup>1</sup> Nathaniel A. Lynd,<sup>1</sup> Maxwell J. Robb,<sup>2</sup> Kimberly A. See,<sup>1</sup> Se Gyu Jang,<sup>1</sup> Jason M. Spruell,<sup>1</sup> Craig J. Hawker<sup>1,2\*</sup>

1. Materials Research Laboratory and Materials Department, University of California, Santa Barbara, California 93106
2. Department of Chemistry and Biochemistry, University of California, Santa Barbara, California 93106

### SUPPORTING INFORMATION

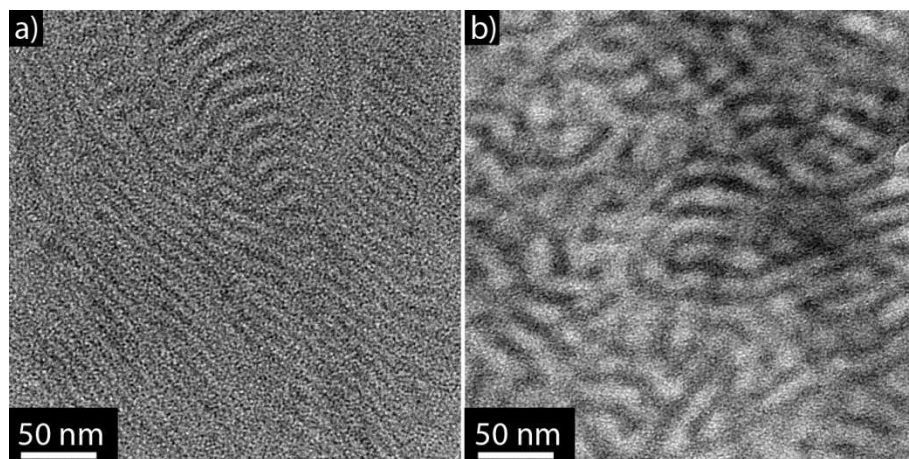

**Figure S1.** Bulk morphology of polymers after thermal annealing. a) diblock copolymer c) triblock copolymer

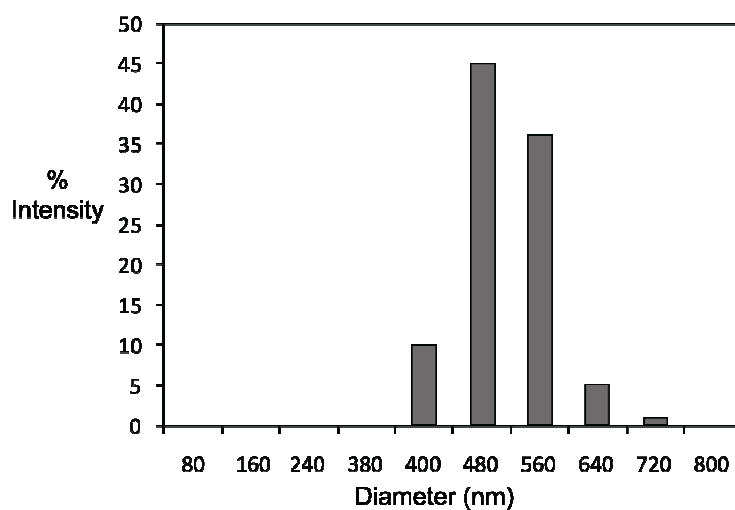

**Figure S2.** Typical size distribution of triblock copolymer particle assembly after 65% water addition.

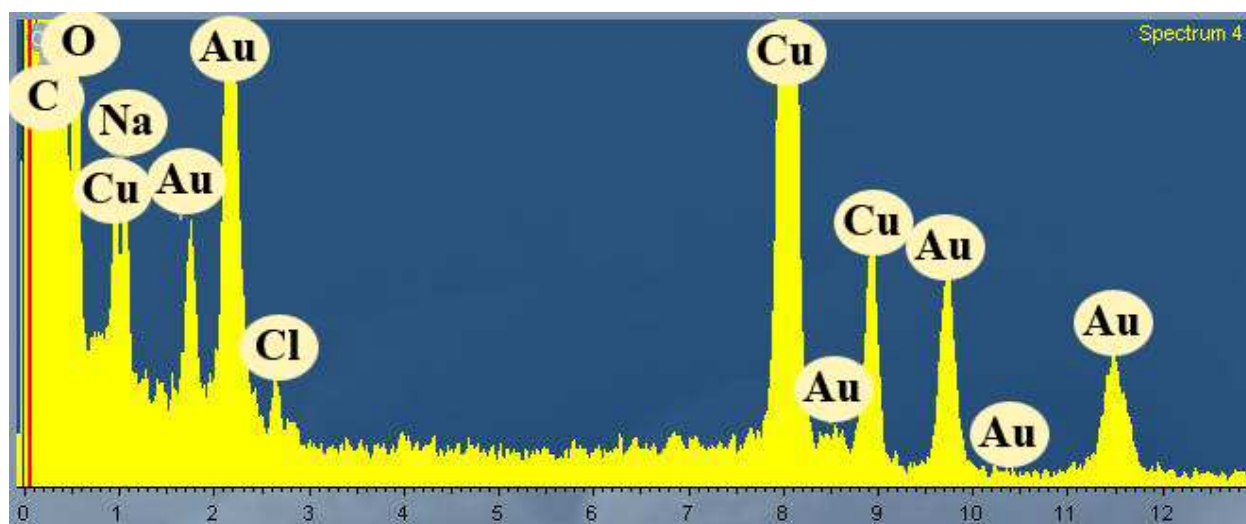

**Figure S3.** EDX spectra of reduced gold nanoparticles impeded in polymer colloids (as seen in figure 5c), indicating metallic gold, copper peaks are due to the background from the copper TEM grids.

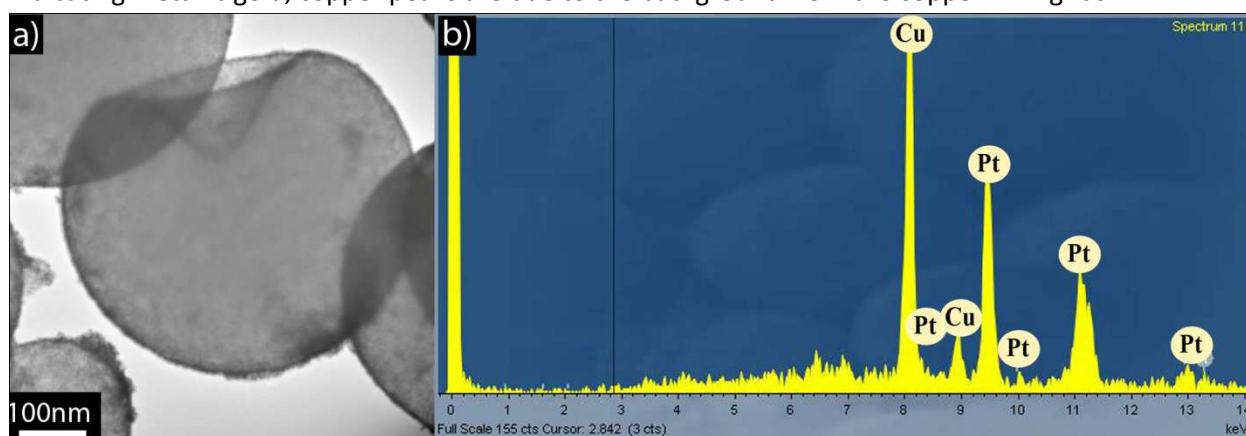

**Figure S4.** a) Platinum nanoparticle loaded PS-*b*-P2VP diblock copolymer particle after the adsorption and reduction of  $\text{H}_2\text{PtCl}_6$ . b) EDX spectra of composite nanoparticles with characteristic platinum peaks, the copper peaks are due to the background from the copper TEM grids.

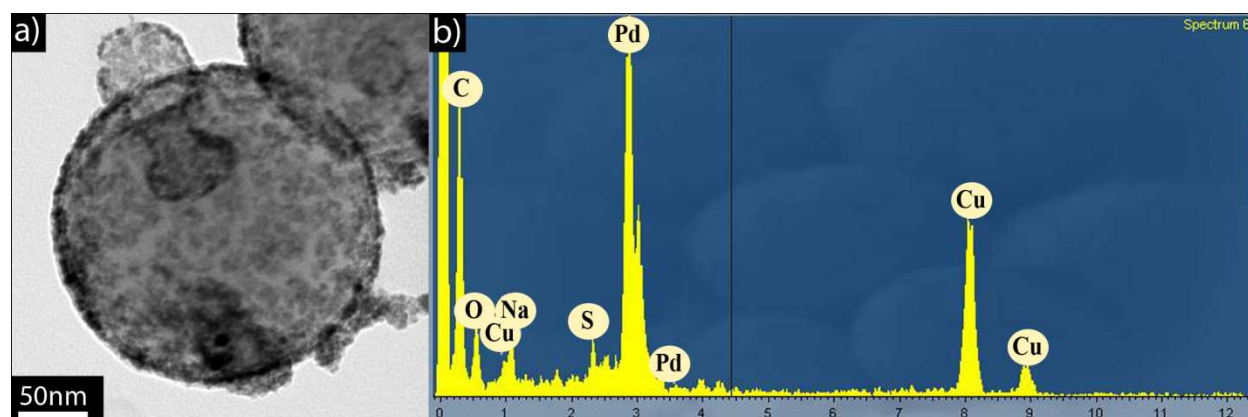

**Figure S5.** a) Palladium nanoparticle loaded PS-*b*-P2VP diblock copolymer particle after the adsorption and reduction of PdCl<sub>2</sub>. b) EDX spectra of composite nanoparticles with characteristic Palladium peaks, the copper peaks are due to the background from the copper TEM grids.

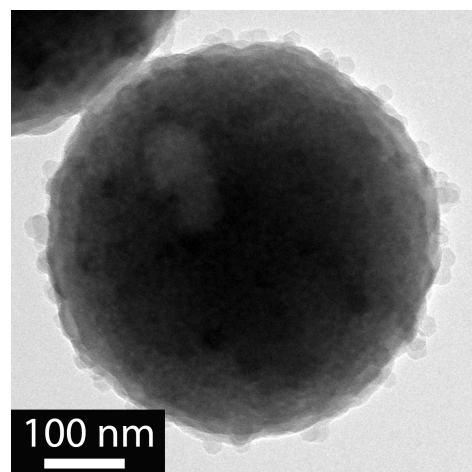

**Figure S6.** Hybrid BCP/silica triblock copolymer particle with silica condensed in the P2VP phase.

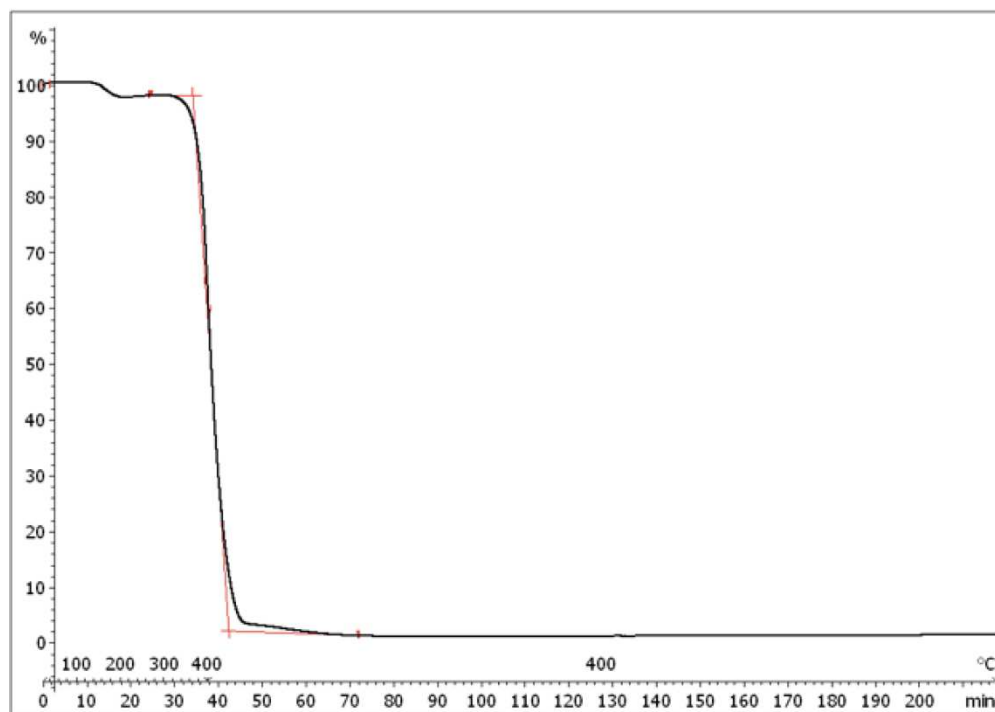

**Figure S7.** Thermal gravimetric analysis of polymer to test the degradation profile under calcinations conditions. The sample was heated to 400 °C and then held at this isotherm. The block copolymer was completely degraded within 1 hour at this isotherm.

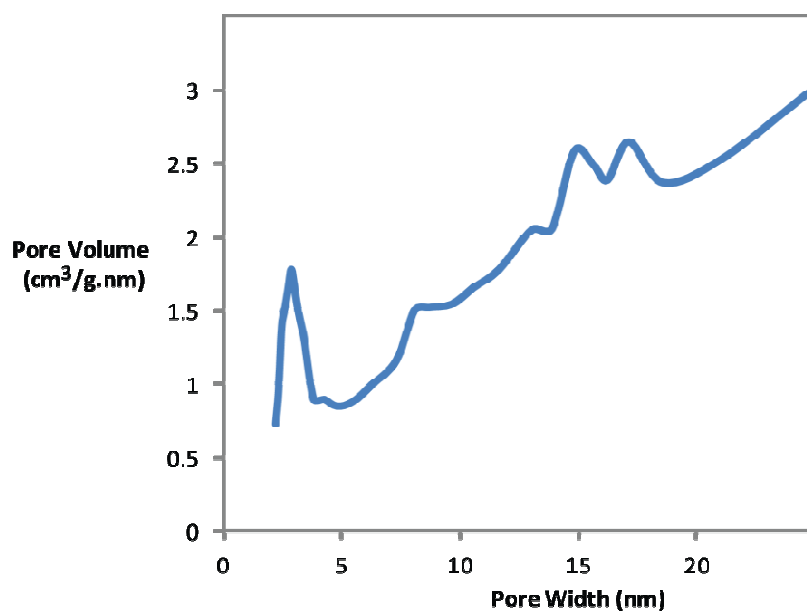

**Figure S8.** Pore diameters as measure by nitrogen isotherm for mesoporous silica nanoparticles after the removal of the BCP template.

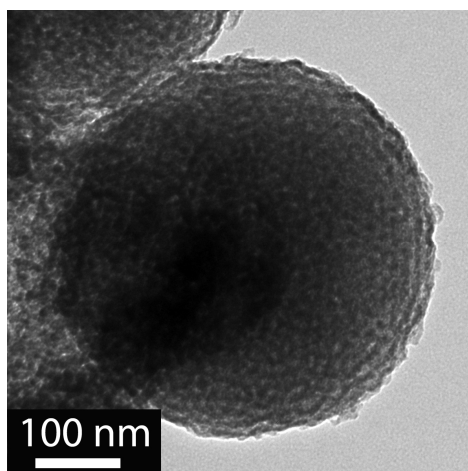

**Figure S9.** Titania mesoporous nanoparticle after the removal of the BCP template.

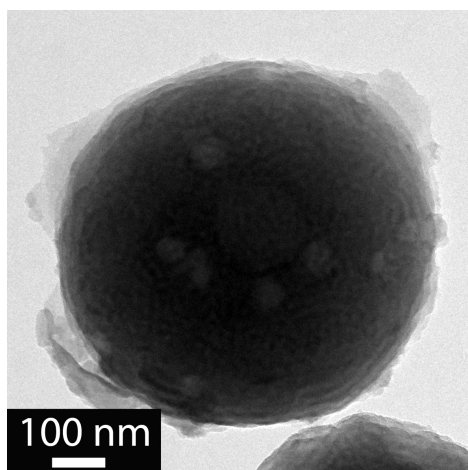

**Figure S10.** Hybrid BCP/Silica onion-like triblock copolymer particle with silica condensed in the P2VP phase.
